# Supplementary material for: Implications of observed inconsistencies in carbonate chemistry measurements for ocean acidification studies
Source: Copernicus journal article supplement (doi:10.5194/bg-9-2401-2012), 2012-07-03
Supplement: Supplementary file 1 [file bg-9-2401-2012-supplement.zip]

## Supplement

### 1. Material and Methods

#### 1.1 Media preparation

Sterile-filtered (0.2  $\mu\text{m}$ ) North Sea seawater (NSW) containing 7.2  $\mu\text{mol L}^{-1}$  silicate was enriched with vitamins and trace metals according to f/2 media (Guillard and Ryther, 1962) as well as with nitrate and phosphate. Final values of nitrate and phosphate were 111.5  $\mu\text{mol L}^{-1}$  and 5.85  $\mu\text{mol L}^{-1}$ , respectively. Nutrients were measured colourimetrically using a continuous flow analyzer (Evolution III, Alliance Instruments, Salzburg, Austria). The salinity was  $32.38 \pm 0.003$  (measured with a Guildline Autosol 8400B, Ontario, Canada). Inorganic artificial seawater (ASW) set to a salinity of 35 was prepared from milliQ water and dried salts as described by Grasshoff et al. (1999).

#### 1.2 $C_T$ adjustments at constant $A_T$

Adjustments of dissolved inorganic carbon ( $C_T$ ) were conducted at  $15 \pm 0.2^\circ\text{C}$  in 2 L borosilicate DURAN bottles equipped with glass frits for aeration. The media were sparged continuously with humidified, 0.2  $\mu\text{m}$ -filtered air of different partial pressures of  $\text{CO}_2$  (180 and 1000  $\mu\text{atm}$ , each in triplicates). Gas flow rates were  $130 \pm 10 \text{ mL min}^{-1}$ . Gas mixtures were generated using a custom-made gas flow controller.  $\text{CO}_2$ -free air ( $<1 \text{ ppm CO}_2$ ; Dominick Hunter, Willich, Germany) was mixed with pure  $\text{CO}_2$  (Air Liquide Deutschland, Düsseldorf, Germany) by a mass flow controller based system (CGM 2000 MCZ Umwelttechnik, Bad Nauheim, Germany). The  $\text{CO}_2$  concentration was regularly measured with a non-dispersive infrared analyzer system (LI6252, LI-COR Biosciences, Bad Homburg, Germany) calibrated with  $\text{CO}_2$ -free air and purchased gas mixtures of  $150 \pm 10$  and  $1000 \pm 20 \text{ ppm CO}_2$  (Air Liquide Deutschland, Düsseldorf, Germany). Seawater samples were taken after 48 hours to ensure equilibration (Fig. 2, supplement).

#### 1.3 $A_T$ adjustments at constant $C_T$

Total alkalinity ( $A_T$ ) was adjusted by addition of calculated amounts of HCl or NaOH (1N Titrisol, Merck, Darmstadt, Germany) to seawater of known  $C_T$ . The manipulated media were stored in 2 L borosilicate DURAN bottles, which were sealed immediately with Teflon-lined screw caps without headspace to avoid  $\text{CO}_2$  exchange with the atmosphere.

## 1.4 Sampling and measurements

Samples for  $A_T$  were 0.6  $\mu\text{m}$ -filtered, stored in 150 mL borosilicate bottles at 3°C and analysed within a week.  $A_T$  was estimated from open-cell duplicate potentiometric titration at  $22 \pm 2^\circ\text{C}$  calculated with modified Gran plots (Brewer et al., 1986) using a TitroLine alpha plus system (Schott Instruments, Mainz, Germany). The calculated  $A_T$  values were corrected for offsets between  $\text{CRM}_{\text{measured}}$  and  $\text{CRM}_{\text{defined}}$  ( $-13 \pm 5 \mu\text{mol kg}^{-1}$ ,  $n=10$ , reproducibility; Certified Reference Materials Batch No. 54, Scripps Institution of Oceanography, USA). An internal North Sea seawater standard was additionally measured.

$C_T$  samples were filtered through 0.2  $\mu\text{m}$  cellulose-acetate filters and stored in 5 mL gas-tight borosilicate bottles at 3°C. As samples were analysed within one week, potential decomposition of organic matter during this period is small and, in any case, would have increased  $C_T$  values rather than being suitable to explain the discrepancies described.  $C_T$  was measured colourimetrically in triplicate with a QuAatro autoanalyzer (Seal, Mequon, USA). The analyser was calibrated with  $\text{NaHCO}_3$  solutions (with a salinity of 35, achieved by addition of NaCl) with concentrations ranging from 1800 to 2300  $\mu\text{mol } C_T \text{ kg}^{-1}$ . CRMs were used for corrections of errors in instrument performance (baseline drift etc.). On average, the CRMs were measured with an offset of  $3 \pm 5 \mu\text{mol kg}^{-1}$  ( $n=20$ , reproducibility) from the assigned value. Shifts in  $C_T$  due to  $\text{CO}_2$  exchange were limited by opening the storage vials less than one minute prior to each measurement.

Seawater pH values were determined by two different approaches, potentiometrically as well as spectrophotometrically. In case of the NSW samples,  $\text{pH}_{\text{total}}$  was determined spectrophotometrically using *m*-cresol purple (Merck KGaG, Darmstadt, Germany; Clayton and Byrne, 1993, Dickson et al., 2007) using a temperature-controlled Cary 4000 UV-VIS-NIR spectrophotometer (Varian, Palo Alto, USA). The spectrophotometric  $\text{pH}_{\text{total}}$  was measured in technical duplicates at  $25 \pm 0.1^\circ\text{C}$ , temperature-corrected and recalculated to  $15.0^\circ\text{C}$  using  $\text{CO}_2\text{sys}$  (Pierrot et al., 2006). The performance of the spectrophotometer used for the  $\text{pH}_{\text{total}}$  measurements (Cary 4000, Varian) was validated complying with the US Pharmacopeia requirements. Absorption measurements were corrected for background absorption (Dickson et al., 2007) and pH changes due to dye addition (calculated from the average effect of a second dye addition to every sample). Furthermore, the average values of CRM measurements (Tris-based pH reference materials) at the beginning and the end of one measuring run were used to correct the sample values. On average, the CRMs were measured with an offset of  $-0.003 \pm 0.003$  ( $n=7$ , repeatability at  $\text{pH} = 8.1$ ) from the assigned value. Carbonate chemistry calculations were based on total scale pH measurements. For the

potentiometric measurement (no replication), the glass reference electrode (IOLine, Schott Instruments) was calibrated using two buffers traceable back to NIST standards prior to every set of measurements. The pH of NSW samples was thus measured on the NBS scale ( $\text{pH}_{\text{NBS}}$ ). These potentiometric measurements were performed at  $15 \pm 0.2^\circ\text{C}$ , temperature-corrected and reported for  $15.0^\circ\text{C}$  using CO<sub>2</sub>sys. The repeatability was  $\pm 0.02$  pH units ( $n=30$ ). In the case of the ASW samples, seawater pH on the total scale ( $\text{pH}_{\text{total}}$ ) was measured potentiometrically. The measured  $\text{pH}_{\text{NBS}}$  values were converted to the total scale using respective CRMs after determining the offset of measured and assigned pH value (Tris-based pH reference material, Batch No. 2, Scripps Institution of Oceanography, USA).

CO<sub>2</sub> concentrations were determined at  $15 \pm 0.2^\circ\text{C}$  in technical triplicates using a membrane-inlet mass spectrometer (MIMS; Tortell, 2005), which consists of a thermostated cuvette being connected to a sector field multi-collector MS (Isoprime; GV Instruments, England). The MIMS was calibrated for CO<sub>2</sub> by injections of known amounts of NaHCO<sub>3</sub> into 8 ml of 0.2 N HCl (Schulz et al., 2006). The CO<sub>2</sub> baseline was determined by addition of 20  $\mu\text{L}$  10 N NaOH. CO<sub>2</sub> concentrations were measured with a reproducibility of  $\pm 0.13 \mu\text{mol kg}^{-1}$  ( $n = 15$ ).

## 1.5 Calculations of carbonate chemistry

Calculations were performed using the program CO<sub>2</sub>sys (Pierrot et al., 2006) and verified with the MATLAB files based on Zeebe and Wolf-Gladrow (2001). The dissociation constants of carbonic acid of Mehrbach et al. (1973; refit by Dickson and Millero, 1987) were used for calculations. Dissociation constants for HSO<sub>4</sub> were taken from Dickson (1990). CO<sub>2</sub> concentrations obtained with MIMS were converted to  $f\text{CO}_2$  by applying Henry's law (Weiss, 1974) and further converted to  $p\text{CO}_2$  using CO<sub>2</sub>sys.

In case of the study by Schneider & Erez (2008), nutrient concentrations were taken from Makey et al. (2009;  $0.1 \mu\text{mol kg}^{-1}$  phosphate and  $2 \mu\text{mol kg}^{-1}$  silicate). In case of the dataset from Thomsen et al. (2010), concentration of  $2 \mu\text{mol kg}^{-1}$  phosphate and  $3 \mu\text{mol kg}^{-1}$  silicate were assumed (Gerlach, 1990). In case of the dataset of Iglesias-Rodríguez et al. (2008), typical concentrations in (non-diatom) phytoplankton cultures were assumed ( $8 \mu\text{mol kg}^{-1}$  phosphate and  $6 \mu\text{mol kg}^{-1}$  silicate).

**Table 1.** Measured carbonate chemistry parameters (pH,  $C_T$ ,  $A_T$  and  $[CO_2]$ ) and resulting  $pCO_2$  values calculated from different input parameters using the constants of Mehrbach et al. (1973, refit by Dickson and Millero, 1987) at 15°C. Errors denote standard deviation of technical replicates.

|                                    |                            | measured          |                     |                                            |                                            |                                             | calculated                 |                                                       |                                          |                                          |
|------------------------------------|----------------------------|-------------------|---------------------|--------------------------------------------|--------------------------------------------|---------------------------------------------|----------------------------|-------------------------------------------------------|------------------------------------------|------------------------------------------|
|                                    |                            | pH <sub>NBS</sub> | pH <sub>total</sub> | C <sub>T</sub><br>(μmol kg <sup>-1</sup> ) | A <sub>T</sub><br>(μmol kg <sup>-1</sup> ) | CO <sub>2</sub><br>(μmol kg <sup>-1</sup> ) | pCO <sub>2</sub><br>(MIMS) | pCO <sub>2</sub><br>(A <sub>T</sub> ;C <sub>T</sub> ) | pCO <sub>2</sub><br>(A <sub>T</sub> ;pH) | pCO <sub>2</sub><br>(C <sub>T</sub> ;pH) |
| NSW<br>C <sub>T</sub> manipulation | low pCO <sub>2</sub>       | 8.38              | 8.252 ± 0.005       | 1945 ± 7                                   | 2388 ± 2                                   | 8.34 ± 0.14                                 | 205                        | 143                                                   | 241                                      | 227                                      |
|                                    |                            | 8.39              | 8.319 ± 0.001       | 1946 ± 7                                   | 2385 ± 3                                   | 7.82 ± 0.23                                 | 203                        | 145                                                   | 197                                      | 190                                      |
|                                    |                            | 8.39              | 8.305 ± 0.002       | 1946 ± 4                                   | 2383 ± 3                                   | 7.73 ± 0.23                                 | 219                        | 146                                                   | 202                                      | 195                                      |
|                                    | high pCO <sub>2</sub>      | 7.91              | 7.735 ± 0.001       | 2254 ± 1                                   | 2396 ± 1                                   | 39.31 ± 0.44                                | 1042                       | 662                                                   | 934                                      | 913                                      |
|                                    |                            | 7.88              | -                   | 2254 ± 1                                   | 2386 ± 1                                   | 38.10 ± 0.02                                | 1000                       | 702                                                   | -                                        | -                                        |
|                                    |                            | 7.89              | 7.712 ± 0.000       | 2256 ± 6                                   | 2388 ± 3                                   | 42.59 ± 0.02                                | 1117                       | 703                                                   | 1003                                     | 981                                      |
| NSW<br>A <sub>T</sub> manipulation | low pCO <sub>2</sub>       | 8.46              | 8.313 ± 0.003       | 2211 ± 6                                   | 2643 ± 1                                   | 9.06 ± 0.07                                 | 259                        | 191                                                   | 226                                      | 222                                      |
|                                    |                            | 8.48              | 8.318 ± 0.012       | 2217 ± 6                                   | 2642 ± 0                                   | 9.10 ± 0.04                                 | 268                        | 196                                                   | 219                                      | 217                                      |
|                                    |                            | 8.48              | 8.317 ± 0.000       | 2220 ± 4                                   | 2640 ± 3                                   | 8.60 ± 0.08                                 | 238                        | 199                                                   | 219                                      | 217                                      |
|                                    | high pCO <sub>2</sub>      | 7.72              | 7.616 ± 0.004       | 2186 ± 2                                   | 2276 ± 1                                   | 47.48 ± 1.63                                | 1202                       | 881                                                   | 1193                                     | 1172                                     |
|                                    |                            | 7.81              | 7.610 ± 0.004       | 2180 ± 4                                   | 2278 ± 3                                   | 47.51 ± 0.23                                | 1247                       | 831                                                   | 1224                                     | 1197                                     |
|                                    |                            | 7.79              | 7.617 ± 0.013       | 2186 ± 1                                   | 2276 ± 1                                   | 47.89 ± 0.02                                | 1257                       | 881                                                   | 1193                                     | 1172                                     |
| ASW<br>A <sub>T</sub> manipulation | low pCO <sub>2</sub>       | -                 | 8.20                | 2192 ± 1                                   | 2612 ± 0                                   | -                                           | -                          | 205                                                   | 298                                      | 286                                      |
|                                    |                            | -                 | 8.20                | 2204 ± 2                                   | 2605 ± 3                                   | -                                           | -                          | 220                                                   | 297                                      | 288                                      |
|                                    |                            | -                 | 8.19                | 2206 ± 0                                   | 2597 ± 2                                   | -                                           | -                          | 227                                                   | 305                                      | 296                                      |
|                                    | intermed. pCO <sub>2</sub> | -                 | 7.88                | 2184 ± 1                                   | 2390 ± 1                                   | -                                           | -                          | 461                                                   | 644                                      | 628                                      |
|                                    |                            | -                 | 7.88                | 2199 ± 6                                   | 2391 ± 2                                   | -                                           | -                          | 500                                                   | 644                                      | 632                                      |
|                                    |                            | -                 | 7.88                | 2199 ± 1                                   | 2389 ± 1                                   | -                                           | -                          | 505                                                   | 643                                      | 632                                      |
|                                    | high pCO <sub>2</sub>      | -                 | 7.60                | 2087 ± 6                                   | 2173 ± 1                                   | -                                           | -                          | 865                                                   | 1183                                     | 1161                                     |
|                                    |                            | -                 | 7.49                | 2119 ± 4                                   | 2172 ± 2                                   | -                                           | -                          | 1121                                                  | 1547                                     | 1519                                     |
|                                    |                            | -                 | 7.47                | 2122 ± 6                                   | 2172 ± 3                                   | -                                           | -                          | 1149                                                  | 1624                                     | 1592                                     |

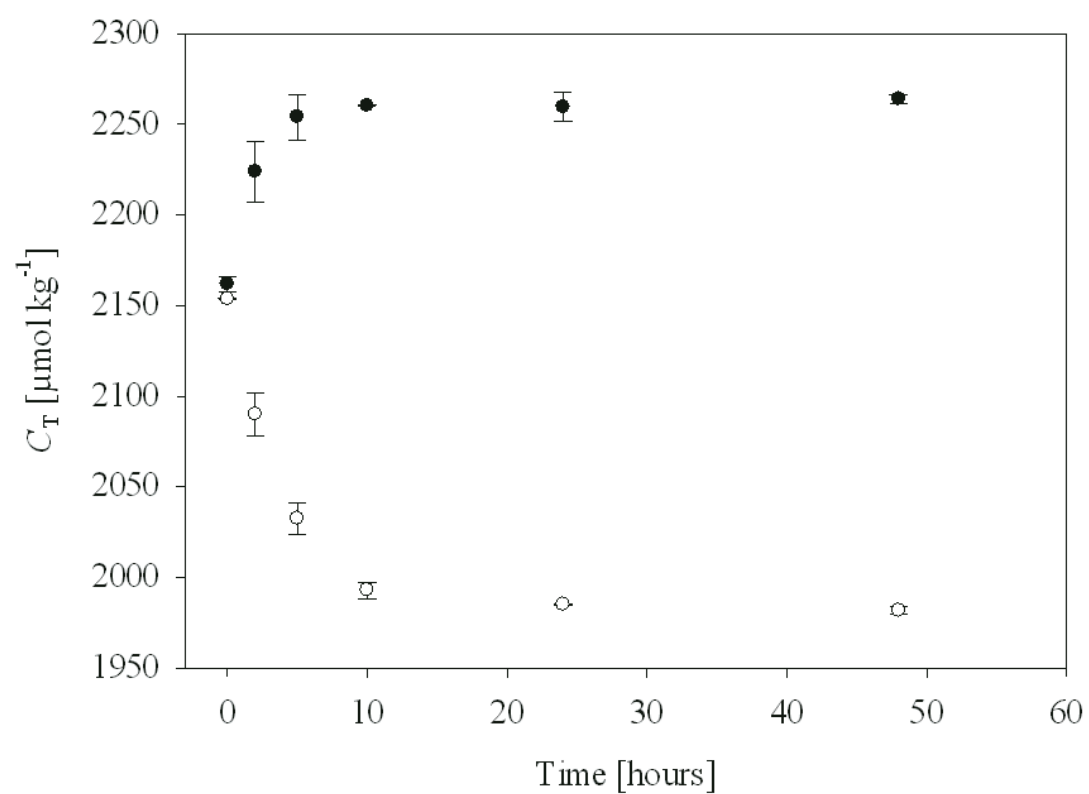

**Figure 2.** Equilibration kinetics in  $C_T$  manipulation experiments at 15°C represented by changes in  $C_T$  at low (open circles) and high  $p\text{CO}_2$  (filled circles). Flow rates of equilibration gasses were  $130 \pm 10 \text{ mL min}^{-1}$ .

## References

- Brewer, P. G., Bradshaw, A. L., and Williams, R. T.: Measurement of total carbon dioxide and alkalinity in the North Atlantic ocean in 1981, in: *The Changing Carbon Cycle – A Global Analysis*, Trabalka, J. R. and Reichle, D. E. (Eds.), Springer, Germany, 358–381, 1986.
- Clayton, T. and Byrne, R. H.: Spectrophotometric seawater pH measurements: total hydrogen ion concentration scale calibration of *m*-cresol purple and at-sea results, *Deep-Sea Res.*, 40, 2115–2129, 1993.
- Dickson, A. G.: Standard potential of the reaction:  $\text{AgCl(s)} + \frac{1}{2} \text{H}_2\text{(g)} = \text{Ag(s)} + \text{HCl(aq)}$ , and the standard acidity constant of the ion  $\text{HSO}_4^-$  in synthetic seawater from 273.15 to 318.15 K, *J. Chem. Thermodyn.*, 22, 113–127, 1990.
- Dickson, A. G., and Millero F. J.: A comparison of the equilibrium constants for the dissociation of carbonic acid in seawater media, *Deep-Sea Research*, 34, 1733–1743, 1987.
- Dickson, A. G., Sabine, C. L., and Christian, J. R. (Eds.): *Guide to best practices for ocean CO<sub>2</sub> measurements*, PICES Special Publication, 3, Sidney, Canada, 2007.
- Guillard, R. R. L. and Ryther, J. H.: Studies of marine planktonic diatoms. I. *Cyclotella nana* Hustedt and *Detonula confervacea* Cleve, *Can. J. Microbiol.*, 8, 229–239, 1962.
- Grasshoff, K., Kremling, K., and Ehrhardt, M.: *Methods of Seawater Analysis* 3rd ed., Wiley-VCH, Weinheim, 1999.
- Pierrot, D. E., Lewis, E., Wallace, D. W. R., 2006. MS Excel Program Developed for CO<sub>2</sub> System Calculations, ORNL/CDIAC-105a, Carbon Dioxide Information Analysis Centre, Oak Ridge National Laboratory. US Department of Energy.
- Tortell, P. D.: Dissolved gas measurements in oceanic waters made by membrane inlet mass spectrometry, *Limnol. Oceanogr.: Methods*, 3, 24–37, 2005.
- Schulz, K. G., Riebesell, U., Rost, B., Thoms S., and Zeebe, R. E.: Determination of the rate constants for the carbon dioxide to bicarbonate inter-conversion in pH-buffered seawater systems, *Mar. Chem.*, 100, 53–65, 2006.
- Weiss, R. F.: Carbon dioxide in water and seawater. The solubility of a non-ideal gas, *Mar. Chem.*, 2, 203–215, 1974.
- Zeebe, R. E. and Wolf-Gladrow, D. A.: *CO<sub>2</sub> in Seawater: Equilibrium, Kinetics, Isotopes*, Elsevier Science, Amsterdam, The Netherlands, 2001.
