# Supplementary material for: Implications of observed inconsistencies in carbonate chemistry measurements for ocean acidification studies
Source: Copernicus journal article supplement (doi:10.5194/bg-9-2401-2012), 2012-07-03
Supplement: Supplementary file 2 [file bg-9-2401-2012-supplement.zip]

Archive with 9 entries (6 files):
- Hoppe_et_al_2012_supplement/
- Hoppe_et_al_2012_supplement/.DS_Store
- __MACOSX/
- __MACOSX/Hoppe_et_al_2012_supplement/
- __MACOSX/Hoppe_et_al_2012_supplement/._.DS_Store
- Hoppe_et_al_2012_supplement/Hoppe_et_al_2012_all_inputdata.csv
- __MACOSX/Hoppe_et_al_2012_supplement/._Hoppe_et_al_2012_all_inputdata.csv
- Hoppe_et_al_2012_supplement/Hoppe_et_al_2012_supplement_final.pdf
- __MACOSX/Hoppe_et_al_2012_supplement/._Hoppe_et_al_2012_supplement_final.pdf
